# Supplementary material
Source: bioRxiv or medRxiv preprint supplement (https://www.medrxiv.org/highwire/filestream/93978/field_highwire_adjunct_files/0/2020.08.20.20178541-1.pdf)
Supplement: Supplementary file [file 2020.08.20.20178541-1.pdf]

Supplementary table A: Overview of medical comorbidity history of the cohort

| Summary                         | 1 Comorbidity                    | 2 Comorbidity                            | 3 Comorbidity               | 0 Comorbidity | Total        |
|---------------------------------|----------------------------------|------------------------------------------|-----------------------------|---------------|--------------|
| Sample (n, %)                   | 20 (35)                          | 9 (16)                                   | 3 (5)                       | 25 (44)       | 57 (100)     |
| PIMS-TS                         | 10 (18)                          | 2 (4)                                    | -                           | 19 (33)       | 31 (54)      |
| Respiratory presentation        | 3 (5)                            | 3 (5)                                    | 3 (5)                       | 1 (2)         | 10 (18)      |
| Asymptomatic                    | 2 (4)                            | 1 (2)                                    | -                           | 1 (2)         | 4 (7)        |
| Other*                          | 5 (9)                            | 2 (4)                                    | 1 (2)                       | 4 (7)         | 12 (21)      |
| COVID-19 Subcategory            | 1 <sup>st</sup> Comorbidity      | 2 <sup>nd</sup> Comorbidity              | 3 <sup>rd</sup> Comorbidity | -             | Total (n, %) |
| PIMS-TS (n=31)                  | -                                | -                                        | -                           | -             | 19 (61)      |
|                                 | Obesity**                        | -                                        | -                           | -             | 7 (23)       |
|                                 | Obesity                          | Sickle cell disease                      | -                           | -             | 1 (3)        |
|                                 | Obesity                          | Endocrine disease <sup>†</sup>           | -                           | -             | 1 (3)        |
|                                 | Sickle cell disease              | -                                        | -                           | -             | 1 (3)        |
|                                 | Respiratory disease <sup>‡</sup> | -                                        | -                           | -             | 1 (3)        |
|                                 | Neurological disease             | -                                        | -                           | -             | 1 (3)        |
| Respiratory presentation (n=10) | -                                | -                                        | -                           | -             | 1 (10)       |
|                                 | Obesity                          | -                                        | -                           | -             | 2 (20)       |
|                                 | Obesity                          | Haematological malignancy                | -                           | -             | 1 (10)       |
|                                 | Obesity                          | Respiratory disease                      | Neurological disease        | -             | 1 (10)       |
|                                 | Ex-premature <sup>Δ</sup>        | -                                        | -                           | -             | 1 (10)       |
|                                 | Ex-premature                     | Airway <sup>Ω</sup>                      | -                           | -             | 1 (10)       |
|                                 | Ex-premature                     | Airway                                   | Cardiac disease             | -             | 1 (10)       |
|                                 | Ex-premature                     | Airway                                   | Oncological malignancy      | -             | 1 (10)       |
|                                 | Respiratory disease              | Cardiac disease                          | -                           | -             | 1 (10)       |
| Asymptomatic (n=4)              | -                                | -                                        | -                           | -             | 1 (25)       |
|                                 | Obesity                          | Metabolic disease                        | -                           | -             | 1 (25)       |
|                                 | Sickle cell disease              | -                                        | -                           | -             | 1 (25)       |
|                                 | Oncological malignancy           | -                                        | -                           | -             | 1 (25)       |
| Other (n=12)                    | -                                | -                                        | -                           | -             | 4 (33)       |
|                                 | Obesity                          | Oncological or haematological malignancy | -                           | -             | 1 (8)        |
|                                 | Obesity                          | Endocrine disease                        | -                           | -             | 1 (8)        |
|                                 | Ex-premature                     | -                                        | -                           | -             | 1 (8)        |
|                                 | Ex-premature                     | Respiratory disease                      | Gastro-intestinal disease   | -             | 1 (8)        |
|                                 | Oncological malignancy           | -                                        | -                           | -             | 1 (8)        |
|                                 | Neurological disease             | -                                        | -                           | -             | 3 (25)       |

\* "Other" as defined in Table 1.

\*\*Obesity defined as weight-for-age and/or BMI-for age percentile  $\geq 95\%$

† Endocrine disease: type 1 diabetes

‡ Respiratory disease: chronic lung disease, bronchiectasis, asthma, lobectomy

Δ Premature defined as <37 weeks gestation or documented history of 'prematurity'

Ω Airway disease: tracheomalacia, cleft palate

COVID-19: coronavirus disease 2019; PIMS-TS: paediatric inflammatory multisystem syndrome temporally associated with SARS-CoV-2; SARS-CoV-2: severe acute respiratory syndrome coronavirus 2
